# Supplementary material for: A Novel Method for Gene-Specific Enhancement of Protein Translation by Targeting 5’UTRs of Selected Tumor Suppressors
Source: PubMed Central journal article supplement (PMC4865139; doi:10.1371/journal.pone.0155359), 2016-05-12
Supplement: pone.0155359.s001.pdf [file pone.0155359.s001.pdf]

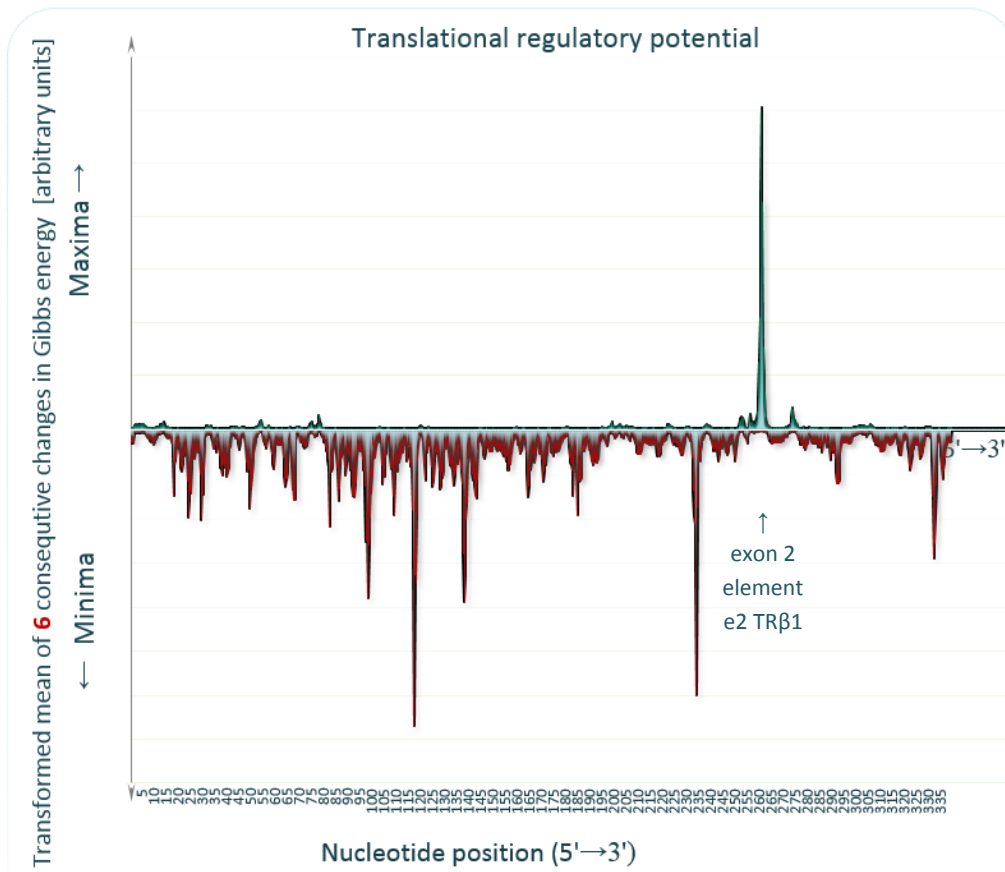

← (b) a graph generated by *dGenhancer*.  
Variant F of TRβ1 5'UTR.

$$\Delta G = -125,3 \text{ [kcal/mol].}$$

$$E = \text{Max } \Delta G - n * \Delta G = 6,40 \text{ [kcal/mol]} \sim \text{susceptibility to translation enhancement (more info. in section d).}$$

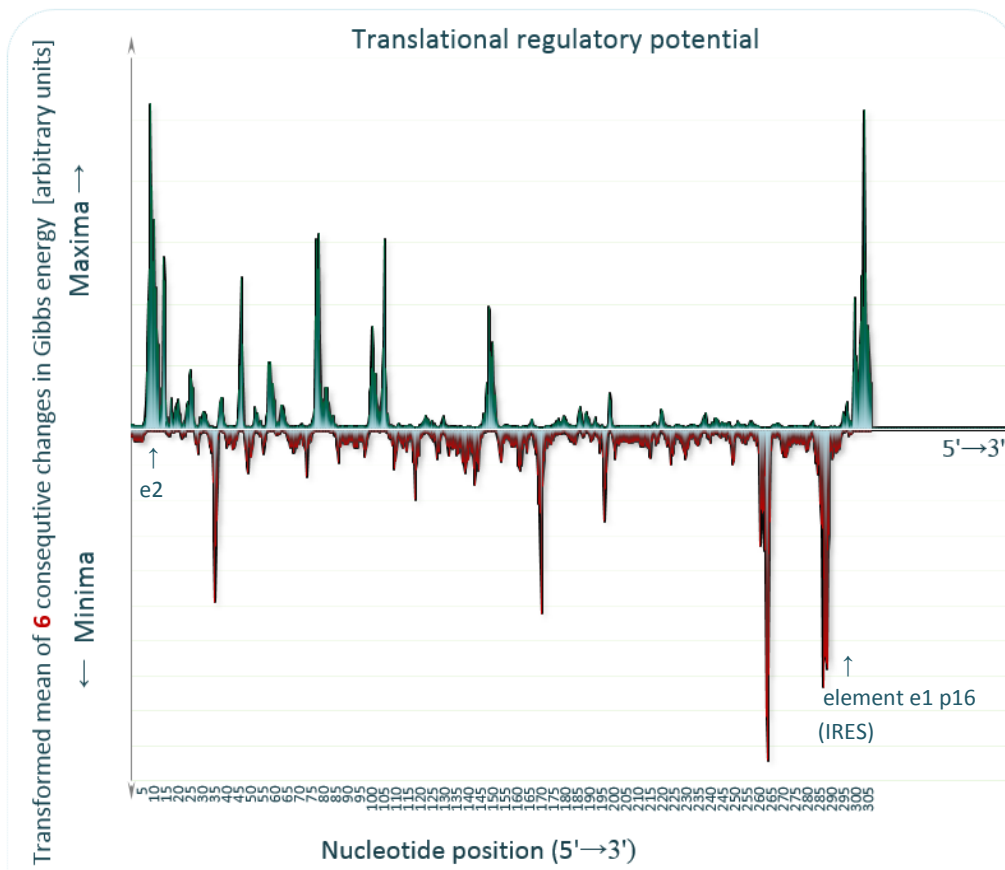

← (c) a graph generated by *dGenhancer*.

5'UTR of variant p16INK4a (CDKN2A).

$$\Delta G = -146,4 \text{ [kcal/mol],}$$

$$E = \text{Max } \Delta G - n * \Delta G = 7,10 \text{ [kcal/mol].}$$

(d) Selected print screens of dGenhancer calculations (Variant A of TRβ1 5'UTR).

All annotations and formulae are included in the dGenhancer calculator.

Put your data in the table

Tested sequence (D3) Sequence length [nt]

Paste your sequence as a text → AAGAGCCCGCAGGCTACCTTCCCGGG CAGGGGCGCTCAACCAACCGGCTCCA 211

Sample name → Variant A of TRbeta1 5'UTR

Go to [2-sort the results] → OK

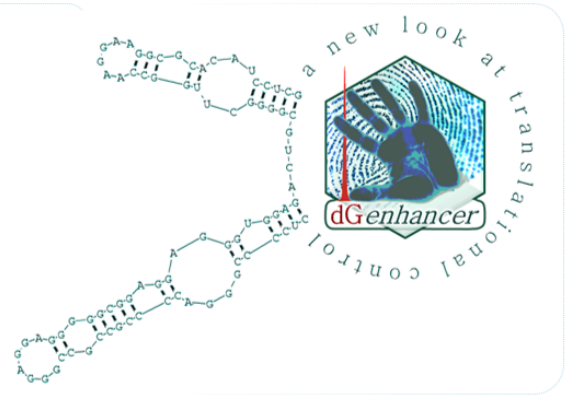

Short instruction (with internal links):

1. Paste the sequence of your interest into D3 cell. The sequence may have no gaps or other signs (only A G C and T are allowed)
2. Copy (as text) each sequence from column M and calculate value of Gibbs energy for each one (use any available software to calculate the gibbs energy), then clear old (exemplary) data in column P and paste your new data in cells of column P.
3. Sort the results (2-...) and take your results (3-...).

2016-03-26 22:41

Analysis parameters: Reference parameters

|                                          |     |               |
|------------------------------------------|-----|---------------|
| First substituting nucleotide →          | A   | A, G, C, or T |
| Second substituting nucleotide →         | C   | A, G, C, or T |
| Third substituting nucleotide →          | T   | A, G, C, or T |
| Fourth substituting nucleotide →         | G   | A, G, C, or T |
| Number of substitutions per base →       | 3   | 3 or 4        |
| Exponent →                               | 140 | 20-200        |
| Enhancing (E) or Silencing (S) effects → | E   | E or S        |
| Length of designed dGoligo →             | 21  | any           |
| SNP position within sense-like dGoligo → | 11  | any           |
| Loop position within microRNA-like dG →  | 11  | any           |
| Sequence of the loop →                   | ttt | any           |

Take your results OK

Base of the tested seq. Nucleotide position ↓ P = ΔG<sub>s</sub> ↓

|    | 5' | 5' | M                          | P      |
|----|----|----|----------------------------|--------|
| 1  | A  | A  | AAGAGCCCGCAGGCTACCTTCC ... | -67,80 |
| 1  | A  | C  | CAGAGCCCGCAGGCTACCTTCC ... | -67,80 |
| 1  | A  | T  | TAGAGCCCGCAGGCTACCTTCC ... | -67,80 |
| 1  | A  | G  | GAGAGCCCGCAGGCTACCTTCC ... | -67,80 |
| 2  | A  | C  | ACGAGCCCGCAGGCTACCTTCC ... | -67,80 |
| 2  | A  | T  | ATGAGCCCGCAGGCTACCTTCC ... | -67,80 |
| 2  | A  | G  | AGGAGCCCGCAGGCTACCTTCC ... | -69,70 |
| 3  | G  | A  | AAAAGCCCGCAGGCTACCTTCC ... | -67,80 |
| 3  | G  | C  | AACAGCCCGCAGGCTACCTTCC ... | -67,80 |
| 3  | G  | T  | AATAGCCCGCAGGCTACCTTCC ... | -68,00 |
| 4  | A  | C  | AAGCGCCCGCAGGCTACCTTCC ... | -67,50 |
| 4  | A  | T  | AAGTGCCCGCAGGCTACCTTCC ... | -68,40 |
| 4  | A  | G  | AAGGGCCCGCAGGCTACCTTCC ... | -68,40 |
| 17 | C  | G  | AAGAGCCCGCAGGCTAGCTTCC ... | -68,50 |
| 17 | C  | A  | AAGAGCCCGCAGGCTAACTTCC ... | -66,30 |
| 18 | C  | T  | AAGAGCCCGCAGGCTACTTTC ...  | -67,50 |
| 18 | C  | G  | AAGAGCCCGCAGGCTACGTTC ...  | -68,00 |
| 18 | C  | A  | AAGAGCCCGCAGGCTACATTCC ... | -68,10 |
| 19 | T  | G  | AAGAGCCCGCAGGCTACCGTCC ... | -69,40 |
| 19 | T  | A  | AAGAGCCCGCAGGCTACCATCC ... | -66,40 |
| 19 | T  | C  | AAGAGCCCGCAGGCTACCTTCC ... | -70,20 |
| 20 | T  | G  | AAGAGCCCGCAGGCTACCTGCC ... | -71,40 |
| 20 | T  | A  | AAGAGCCCGCAGGCTACCTACC ... | -67,80 |
| 20 | T  | C  | AAGAGCCCGCAGGCTACCTTCC ... | -68,80 |
| 21 | C  | T  | AAGAGCCCGCAGGCTACCTTTC ... | -68,50 |
| 21 | C  | G  | AAGAGCCCGCAGGCTACCTTGC ... | -71,20 |
| 21 | C  | A  | AAGAGCCCGCAGGCTACCTTAC ... | -67,80 |
| 22 | C  | T  | AAGAGCCCGCAGGCTACCTTCT ... | -68,80 |
| 23 | C  | T  | AAGAGCCCGCAGGCTACCTTCC ... | -69,10 |
| 23 | C  | G  | AAGAGCCCGCAGGCTACCTTCC ... | -70,40 |
| 23 | C  | A  | AAGAGCCCGCAGGCTACCTTCC ... | -66,10 |
| 24 | C  | T  | AAGAGCCCGCAGGCTACCTTCC ... | -70,60 |
| 24 | C  | G  | AAGAGCCCGCAGGCTACCTTCC ... | -69,10 |
| 24 | C  | A  | AAGAGCCCGCAGGCTACCTTCC ... | -65,50 |
| 25 | G  | A  | AAGAGCCCGCAGGCTACCTTCC ... | -64,90 |
| 25 | G  | C  | AAGAGCCCGCAGGCTACCTTCC ... | -69,10 |
| 25 | G  | T  | AAGAGCCCGCAGGCTACCTTCC ... | -66,90 |
| 26 | G  | A  | AAGAGCCCGCAGGCTACCTTCC ... | -65,80 |
| 26 | G  | C  | AAGAGCCCGCAGGCTACCTTCC ... | -68,40 |
| 26 | G  | T  | AAGAGCCCGCAGGCTACCTTCC ... | -66,50 |
| 27 | G  | A  | AAGAGCCCGCAGGCTACCTTCC ... | -66,60 |
| 27 | G  | C  | AAGAGCCCGCAGGCTACCTTCC ... | -66,60 |
| 27 | G  | T  | AAGAGCCCGCAGGCTACCTTCC ... | -68,40 |
| 28 | C  | T  | AAGAGCCCGCAGGCTACCTTCC ... | -67,80 |
| 28 | C  | G  | AAGAGCCCGCAGGCTACCTTCC ... | -68,00 |
| 28 | C  | A  | AAGAGCCCGCAGGCTACCTTCC ... | -67,80 |
| 29 | A  | C  | AAGAGCCCGCAGGCTACCTTCC ... | -71,20 |
| 29 | A  | T  | AAGAGCCCGCAGGCTACCTTCC ... | -69,40 |
| 29 | A  | G  | AAGAGCCCGCAGGCTACCTTCC ... | -68,30 |
| 30 | G  | A  | AAGAGCCCGCAGGCTACCTTCC ... | -65,10 |
| 30 | G  | C  | AAGAGCCCGCAGGCTACCTTCC ... | -67,40 |
| 30 | G  | T  | AAGAGCCCGCAGGCTACCTTCC ... | -66,40 |

Sequences of the most importance

| Sense dGoligo covering SNP (in the middle) | Sense dGoligo covering SNP (in the middle)                        | Sense, microRNA-like dGoligo containing a loop located in SNP | Nucleotide position |
|--------------------------------------------|-------------------------------------------------------------------|---------------------------------------------------------------|---------------------|
| Maximum ΔG [kcal/mol]: -63,5               | Forward: GGCTGCTCCTGCGTGGTGCCA<br>Reversed: TGGCACCCACGCAGGACAGCC | GGCTGCTCCTGCTTGGTGCCA                                         | 130                 |
| Minimum ΔG [kcal/mol]: -69,1               | Forward: AGTCCACACATGATTTAATG<br>Reversed: CATTAAATCATGTGGAAC     | AGTCCACACAAHTGATTTAATG                                        | 151                 |
| n*ΔG of "native" seq. [kcal/mol]: -67,80   |                                                                   | CATTAAATCAAATGTGGAAC                                          | 151                 |

Change in Gibbs energy

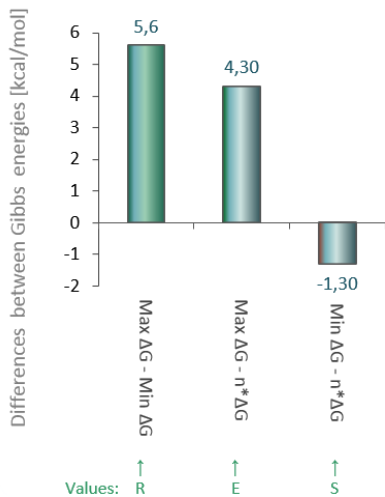

Max ΔG = max. value of Gibbs energy.  
Maximum of Gibbs energy after substitution of a nucleotide (virtual SNP). The least folded sequence.  
Less negative value.  
~ the state that can facilitate the translation initiation.

Min ΔG = min. value of Gibbs energy.  
Minimum of Gibbs energy after substitution of a nucleotide (virtual SNP). The most strongly folded sequence.  
More negative value.  
~ the state that can inhibit the translation initiation.

n\*ΔG  
Value of Gibbs energy of non-substituted, native sequence.

G = Max ΔG - Min ΔG  
~ susceptibility to ΔG-dependent translation regulation.

E = Max ΔG - n\*ΔG ≈ how much the SNP could enhance translation efficiency,  
~ susceptibility to dG-mediated translation enhancement.

S = Min ΔG - n\*ΔG ≈ how much the SNP could silence translation efficiency  
~ susceptibility to dG-mediated translation silencing.

**dGoligo design and synthesis.** dGs were synthesized as a structurally diverse group of sense-, antisense- or microRNA-like DNA oligonucleotides (Table S3). dGs were designed to target the most stable (showing the most negative  $\Delta G$ ) secondary structures of indicated *cis*-acting elements of TR $\beta$ 1 5'UTRs, thus the primary function of synthetic dGs was to change the *Gibbs energy-dependent secondary structure formation* [s2, s3]. Except for a short 3-nt loop structure in microRNA-like dGs (dG5, dG6, dG9, dG10), the oligonucleotides share full homology with human TR $\beta$ 1 mRNA sequence (NCBI GeneBank Acc. No. NM\_000461), 5'UTR variant A (GeneBank Acc. No. AY286465.1) and 5'UTR variant F (GeneBank Acc. No. AY286470.1). dGs were expected to target one of the sequences: a) element e1 containing a putative IRES site (Master et al. 2010) located on exon 1c/2a junction (dG1, 2, 5, 6), b) element e3 - a sequence conserved among all TR $\beta$ 1 5'UTR variants, containing multiple alternative AUGs (Fig 2), located on exon 2a/3 junction (dG3, 4) or c) a target site detected automatically with dGenhancer calculator in the middle of exon 2 (dG7, 8, 9 and 10). All dGs were designed as pairs of a) antisense strand (dG2, 4, 6, 8, 10) directly recognizing the indicated regulatory sequence (IRES, uAUG or dGenhancer-detected translation regulating element) on the TR $\beta$ 1 5'UTR and b) sense strand (dG1, 3, 5, 7, 9) releasing the indicated region by binding to a sequence that folds with these regions. (Table S3, Fig 2). All oligonucleotides were synthesized on ABI 3900 High-Throughput DNA Synthesizer (Applied Biosystems, Foster City, CA) using standard DNA phosphoramidites or 2'-O-methyl modified RNA phosphoramidites (Link Technologies, Lanarkshire, UK), deprotected by treatment with a 50:50 mixture of ammonium hydroxide and aqueous methylamine (AMA) (Sigma-Aldrich, Saint Louis, MO) and purified on HPLC using Transgenomic Wave System (Transgenomic Omaha, NE).

**dGoligo binding.** The direct dG binding to RNA targets was confirmed with a standard gel-electrophoresis technique and using an approach based on primer extension by reverse transcriptase. Proper length and quality of PCR products was confirmed in agarose gel electrophoresis (Fig S7). Target RNA for dGoligo (dG) binding was obtained by in vitro T7 polymerase-mediated transcription of pKS-A or pKS-F plasmids. Before electrophoresis, RNA (containing TR $\beta$ 1 5'UTR A or F and downstream coding sequence of luciferase) was treated with DNase I (Fermentas, Vilnius, Lithuania) to remove remnant plasmid DNA and purified with RNeasy MinElute Cleanup Kit (Qiagen, Hilden, Germany). Then, 80ng RNA was denatured, co-hybridized with 20pmol of a single dG and stained with SYBR Green I (Fig S7). **Binding selectivity** of dGs was assessed by measuring their ability to drive synthesis of specific cDNAs during reaction of reverse transcription, wherein each tested dG served as a specific primer for reverse transcriptase that requires complementarity between a target sequence and, at least, 3'-end of an oligonucleotide (Fig S8). pKS-A and pKS-F transcripts served as a template for DNA-based antisense-like dGs. Sense-like dGs share the same sequence with matrix RNA, thus were expected to have no effects on transcription of the RNA. In case of the sense dGs, instead of RNA, we used purified first strand cDNA as a template. dG-primed products were synthesized by reverse transcription of pKSs' RNA with RevertAid<sup>TM</sup> H Minus First Strand cDNA Synthesis Kit (Fermentas, Vilnius, Lithuania). The RNAs were previously treated with DNase I (Fermentas, Vilnius, Lithuania) and purified with RNeasy MinElute Cleanup Kit (Qiagen, Hilden, Germany). Then, standard PCR was performed to confirm the expected dG-primed products (Fig S8). Due to a tendency of 2'-O-methyl groups to impede reverse transcriptase [s4], binding of dGs modified by this group were tested only by the standard gel-electrophoresis (Fig S7).

**Genetic constructs containing 5'UTRs.** Preparation of luciferase reporter constructs containing different TR $\beta$ 1 5'UTR variants is described by Francton et al [s5]. **Linear expression construct containing p16INK4a 5'UTR** was performed by assembling: T7 promoter, 5'UTR of p16INK4a (306nt) and luciferase reporter sequence with its 3'UTR. The construct was carried out using a three-step overlap extension PCR protocol [s6] that was elaborated on the basis of principles described by

Roche in the RTS Wheat Germ LinTempGenSet manual [s7, s8] (now distributed by 5 PRIME). In the first step, p16INK4a 5'UTR-specific PCR starters (SI.F and SI.R, Table S4) were used to add overlap regions to the amplified sequence of p16INK4a 5'UTR (see scheme below). T7 promoter and a 5' fragment of luciferase coding sequence (CDS) were added to the flanking primers (cSIII.F-T7.p, cSII.F). The luciferase with 3'UTR was amplified in the second step, wherein luciferase-specific primers (SII.F, SII.R) were used to add overlap regions to the luciferase CDS. Both SI.R and SII.R contained overlap regions (cSIII.F, cSIII.R) for amplifying primers used in the third step. Human cDNA and pGL3 Luciferase Reporter Vector (pGL3-control vector, Promega) were used as a template for the first and second step, respectively. In the third step, overlap extension PCR, the products of the first and second PCR annealed with the added flanking primers (SIII.F, SIII.R) and the 5' and 3' ends were extended. Due to high GC-content in 3'-end of p16INK4a 5'UTR preamplification of the 5'UTR was performed (PCR 0), using shorter primers: S0.F and S0.R, which included one degenerated base to facilitate the PCR 0 (amplicon length = 306bp). Subsequent PCR reactions were performed using the following oligonucleotides: PCR-I (367bp): SI.F(that includes: cSIII.F – T7p. – p16 5'UTR) SI.R(cSII.F); PCR-II (2234bp) SII.F, SII.R(cSIII.R); PCR-III (2234bp) SIII.F, SIII.R (Table S4). Finally, the linear expression construct (2234bp) was ready for subsequent coupled *in vitro* transcription-translation performed using RTS 100 Wheat Germ CECF system. This reaction was carried out in the same way as it was described in TR $\beta$ 1 studies (see article). The following dGs were used: sense dG1p16, antisense dG2p16, microRNA-like sense dG3p16, microRNA-like antisense dG4p16 and scrambled control dGscp16 (Table S3). MicroRNA-like loop was created by adding two non-complementary bases in the middle of dG1p16 and dG2p16. Reverse transcription and semi-quantitative Real-Time PCR was performed as described in Materials and Methods using the same primer pairs. Luc-rev-r, T7prom-f, Luc-RT-f, Luc-RT-r (Table S4).

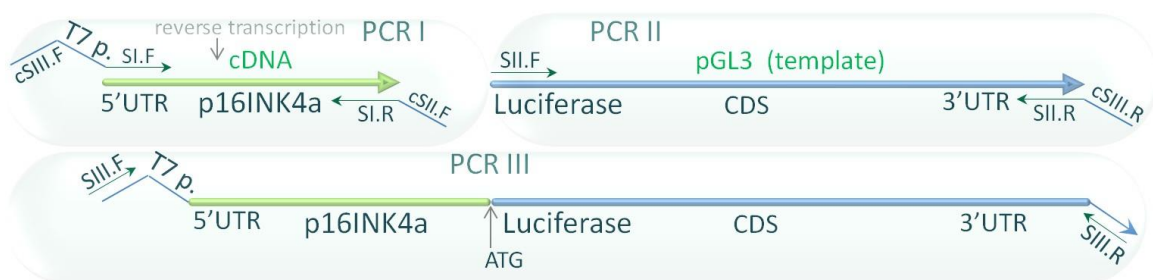

Scheme of PCR-amplified linear expression construct containing 5'UTR of p16INK4a (*CDKN2A*). This construct was generated to serve as a template in coupled *in vitro* transcription/translation assay. T7 promoter (T7.p), 5'UTR of p16INK4a (306nt), luciferase reporter sequence (CDS) together with its 3'UTR were assembled using a three-step overlap extension PCR protocol. SI.F, SI.R, SII.F, SII.R, cSII.F, cSIII.F and cSIII.R represent names of primers (Table S4) that were used in the three-step PCR (PCR I, PCR II and PCR III). Human cDNA and pGL3 Luciferase Reporter Vector (pGL3-control vector, Promega) were used as templates for the first (PCR I) and second step (PCR II) respectively.

**Analysis of translational regulatory potential of TR $\beta$ 1 5'UTRs.** Since the Translation Regulatory Potential (TRP) was important for predicting the 5'UTR target sites for dGs, we tried to determine a numerical parameter that could assess the TRP of our mRNA variants. To determine the TRP of TR $\beta$ 1 5'UTRs we used an exemplary single nucleotide polymorphism (SNP, refID: rs62255380) relating to C219T on a putative TR $\beta$ 1 IRES domain located in exon 2. This SNP was the only one polymorphism of TR $\beta$ 1 5'UTR, validated in NCBI SNP database that could alter *Gibbs energy-dependent secondary structure formation* of all TR $\beta$ 1 5'UTR variants. In other words, we tried to determine the translation regulatory potential of various TR $\beta$ 1 5'UTRs by assessing the effects of the C219T substitution on theoretical translation efficiency (TTE). The calculations and results are shown in Table S2.

**Translation-enhancing assay.** This experiment was performed to assess translation-enhancing effects triggered by dGoligos (dGs). TRβ1 5'UTR-specific, translation-enhancing assay was designed on the basis of a previous observation that one of transcript variants encoded by *CDKN2A* suppressor gene (NCBI Gene ID: 1029) can be efficiently enhanced in the presence of a PCR sense primer directed to its strongly folded 5'UTR. Universality of this approach was confirmed by the use of TRβ1 5'UTR- and p16INK4a 5'UTR-specific dGs. 500ng of the plasmids pKS-A, pKS-F and pKS-control were transcribed and translated in the presence of 0,25μM of tested dG (Table S3) or in the absence of any dG (control), using RTS 100 Wheat Germ CECF system (Roche Diagnostics, Mannheim, Germany) in conditions described in the article. mRNA levels and luciferase activity measured in each experiment were divided by the corresponding results obtained for pKS-control lacking a TRβ1 or p16INK4a 5'-UTR. Reaction mixtures were collected for analysis by luciferase assay and real-time PCR. Reactions were performed in triplicate in three independent assays (Fig 4, Fig 5).

**Translation controlled by IRES-like element in TRβ1 5'UTR.** Since an alternate cap-independent, IRES-dependent translation is demonstrated to be activated by serum deprivation, which can initiate integrated stress response (ISR) [s9, s10], we performed a simple study to determine whether serum-starved Caki-2 cells (clear cell Renal Cell Cancer) can change 5'UTR-controlled translation efficiency of a downstream coding sequence. We used pGL3-A expression plasmid [s5] containing 5'UTR variant A, which has been reported to possess an IRES-like sequence located at exon 1c/2a boundary [s11]. The measurements were shown in relation to pGL3-control plasmid containing an irrelevant synthetic vector-based leader sequence lacking any TRβ1 5'UTR. Caki-2 cells were seeded at 5×10<sup>5</sup> cells per well using 12-well plates and cultured 24 hrs in McCoy's medium supplemented with 10% FBS. After 24 hrs the cells were transfected with 100ng pRL-TK and 1μg of pGL3-A or pGL3-control plasmids, using 1μg/μl PEI and 150 mM NaCl in FBS-free McCoy's medium. 5 hrs after, transfection the medium was replaced with fresh FBS-free medium to induce ISR caused by serum deprivation. At the same time, control cell cultures were supplemented with 10% FBS. Proliferation of the serum-starved Caki-2 cells but not FBS-supplemented cells was inhibited that was assessed by cell counting. The cells were maintained at 37°C in 5% CO<sub>2</sub> atmosphere, harvested after 24 hrs and quickly divided into 2 equal parts – for isolation of total RNA and luciferase protein. Luciferase mRNA levels were assessed with Real-Time PCR and the protein measurements were performed using dual-luciferase assay in the Synergy2 luminometer. The levels of firefly luciferase activity (pGL3-A) were normalized to activity of constitutively expressed Renilla luciferase (pRL-TK). Materials used in this study are described in the article. Data from three independent experiments were performed in 12 repeats. The Shapiro–Wilk test was used to determine normality of data distribution. Normally distributed data were analyzed by ANOVA followed by Dunnett's multiple comparison test, \*p< 0.01, \*\*p<0.0001 vs. control (Fig S2).

**Measurements of transcripts.** Control mRNA levels were determined using quantitative real-time PCR method (Q-PCR), performed with LightCycler® 480 (Roche, Germany). Reaction mixtures of coupled transcription-translation containing equal quantity of reporter constructs were purified using GeneMATRIX Universal RNA Purification Kit (EURx, Gdansk, Poland). Reverse transcription in experiments with luciferase-containing plasmids was performed directly on the purified reaction mixture, using specific primer Luc-rev-r (Table S4, Fig 8) and the RevertAid™ H Minus First Strand cDNA Synthesis Kit (Fermentas, Vilnius, Lithuania). 1μl of 5x diluted reverse transcription reaction was used for further Q-PCR reactions using Quanti-Fast SYBR Green PCR Kit (Qiagen, Hilden, Germany) and first pair of primers: Luc-RT-f and Luc-RT-r amplifying both luciferase DNA (plasmid vector) and cDNA (RNA reverse transcription product), under the following conditions: 95°C 5min; 50 cycles: 95°C 10s, 57°C 15s, 72°C 15s; melting curve analysis: 135 cycles: 50°C; 0.3°C increase in each cycle. Ct data were acquired after reaching the threshold in real-time module, usually between 18

and 36 cycle; cycle efficiency was corrected using LightCycler® 480 (Roche, Germany). Standard curve was prepared using serial dilutions of luciferase cDNA amplification products. Second Q-PCR reaction was performed using second pair of primers: T7prom-f and Luc-RT-r (Table S4), specific only to the template vector DNA, serving as internal control for transcript levels. The final amount of each transcript was calculated by dividing quantity of the PCR products of first primer pair (amplifying both DNA and RNA) and the second primer pair (amplifying only DNA). Relative changes in gene expression were calculated using  $2^{(-\Delta\Delta Ct)}$  [s12]. Levels of naturally occurring mRNAs in *in vivo* experiments were determined as described above, using transcript-specific primers (Table S4).

#### References for supporting materials and methods:

- s1 Reuter JS, Mathews DH. RNAstructure: software for RNA secondary structure prediction and analysis. *BMC Bioinformatics*. 2010 Mar 15;11:129.
- s2 Lu ZJ, Gloor JW, Mathews DH. Improved RNA secondary structure prediction by maximizing expected pair accuracy. *RNA*. 2009 Oct;15(10):1805-13.
- s3 Tinoco I Jr, Collin D, Li PT. The effect of force on thermodynamics and kinetics: unfolding single RNA molecules. *Biochem Soc Trans*. 2004 Nov;32(Pt 5):757-60.
- s4 Maden BE. Mapping 2'-O-methyl groups in ribosomal RNA. *Methods*. 2001 Nov;25(3):374-82.
- s5 Frankton S, Harvey CB, Gleason LM, Fadel A, Williams GR. Multiple messenger ribonucleic acid variants regulate cell-specific expression of human thyroid hormone receptor beta1. *Mol Endocrinol*. 2004 Jul;18(7):1631-42.
- s6 Swartz JR. *Cell-Free Protein Expression*. Springer Science & Business Media, New York 2012,
- s7 Mc Pherson MJ, Moller SG. *PCR, The basic from background to bench*. 1st published, BIOS Scientific Publishers Ltd., Oxford, UK. 2000.
- s8 Singh H, Makino S, Endo Y, Li Y, Stephens AN, Nie G. Application of the wheat-germ cell-free translation system to produce high temperature requirement A3 (HtrA3) proteases. *Biotechniques*. 2012 Jan;52(1):23-8.
- s9 Mokrejs M, Masek T, Vopálensky V, Hlubucek P, Delbos P, Pospíšek M. IRESite--a tool for the examination of viral and cellular internal ribosome entry sites. *Nucleic Acids Res*. 2010 Jan;38(Database issue):D131-6.
- s10 Komar AA, Hatzoglou M. Cellular IRES-mediated translation: the war of ITAFs in pathophysiological states. *Cell Cycle*. 2011 Jan 15;10(2):229-40.
- s11 Master A, Nauman A. Molecular mechanisms of protein biosynthesis initiation - biochemical and biomedical implications of a new model of translation enhanced by the RNA hypoxia response element (rHRE). *Postepy Biochem*. 2014; 60(1):39-54.
- s12 Livak KJ, Schmittgen TD. Analysis of relative gene expression data using real-time quantitative PCR and the  $2^{(-\Delta\Delta C(T))}$  Method. *Methods*. 2001 Dec; 25(4):402-8.
