# Supplementary material for: A Novel Method for Gene-Specific Enhancement of Protein Translation by Targeting 5’UTRs of Selected Tumor Suppressors
Source: PubMed Central journal article supplement (PMC4865139; doi:10.1371/journal.pone.0155359), 2016-05-12
Supplement: pone.0155359.s004.pdf [file pone.0155359.s004.pdf]

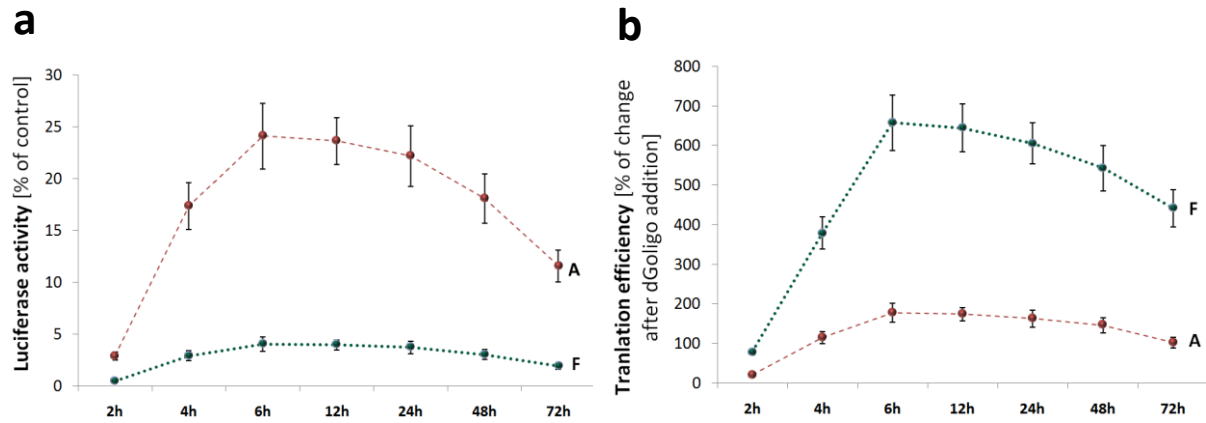

**Fig S3. Time-course of protein synthesis rates in RTS 100 Wheat Germ CECF system.**

(a) Effects of 5'UTR variants A (red line) and F (green line) on luciferase activities (reporter protein levels) after 2, 4, 6, 12, 24, 48 and 72 hours of coupled transcription-translation assay are shown relative to the control plasmid (Control). (b) Effects of both dG1 and dG4 (Table S3) on translation efficiency from pKS-A after 2, 4, 6, 12, 24, 48 and 72 hours (red line) or pKS-F (green line) are shown normalized to control (dG-). Experiments were performed in triplicate and shown as mean % luciferase activity  $\pm$  SD. Data were analyzed by ANOVA, \* $p < 0.001$  vs. control.
