# Supplementary material for: A Novel Method for Gene-Specific Enhancement of Protein Translation by Targeting 5’UTRs of Selected Tumor Suppressors
Source: PubMed Central journal article supplement (PMC4865139; doi:10.1371/journal.pone.0155359), 2016-05-12
Supplement: pone.0155359.s011.pdf [file pone.0155359.s011.pdf]

## Supporting tables

| 5'UTR variant* | GenBank Acc. No.: | Length [nt] | uAUGs [no.] | GC-content [%] | $\Delta G$ [kcal/mol] | Translation** efficiency [%] |
|----------------|-------------------|-------------|-------------|----------------|-----------------------|------------------------------|
| control        | -                 | 29          | 0           | 55.17          | -6.3                  | 100                          |
| <b>A</b>       | AY286465.1        | 211         | 4           | 54.98          | <b>-69.0</b>          | 24.09                        |
| B              | AY286466.1        | 229         | 5           | 54.15          | -82.0                 | 12.08                        |
| C              | AY286467.1        | 195         | 4           | 56.41          | -77.5                 | 14.99                        |
| D              | AY286468.1        | 314         | 5           | 48.09          | -95.0                 | 7.01                         |
| E              | AY286469.1        | 305         | 5           | 47.54          | -92.5                 | 7.99                         |
| <b>F</b>       | AY286470.1        | 339         | 7           | 58.41          | <b>-128.9</b>         | 4.02                         |
| G              | AY286471.1        | 388         | 6           | 52.84          | -127.0                | 3.00                         |

**Table S1. Basic characteristics of selected TR $\beta$ 1 5'UTR variants A-G.**

Prediction of secondary structures of 5'UTRs was performed as described in bioinformatic analysis. The least and most folded TR $\beta$ 1 variants are shown in bold. uAUGs represent start codons located upstream of the main start codon and Kozak consensus sequence. \*TR $\beta$ 1 5'UTR splice variants termed according to Frankton et al 2004. \*\* Translation efficiency measured with RTS 100 Wheat Germ CECF system.
