# Supplementary material for: A Novel Method for Gene-Specific Enhancement of Protein Translation by Targeting 5’UTRs of Selected Tumor Suppressors
Source: PubMed Central journal article supplement (PMC4865139; doi:10.1371/journal.pone.0155359), 2016-05-12
Supplement: pone.0155359.s013.pdf [file pone.0155359.s013.pdf]

| <b>dGoligo full name and target site within 5'UTR</b> | <b>Short -cut</b> | <b>Position 5'→3' [nt]</b> | <b>Target sequence (element)</b> | <b>Structure / strand orientation</b> | <b>Design method</b>            | <b>dGoligo Sequence 5'→3'</b> |
|-------------------------------------------------------|-------------------|----------------------------|----------------------------------|---------------------------------------|---------------------------------|-------------------------------|
| dGoligo1-TRβ1vA-IRES-ex1c/ex2a-F                      | dG1               | 86→108                     | e1 TRβ1                          | sense                                 | manual                          | GGAGGCAGCGGGATCTGCGATTT       |
| dGoligo2-TRβ1vA-anti-IRES-ex1c/ex2a-R                 | dG2               | 108→86                     | e1 TRβ1                          | antisense                             | manual                          | AAATCGCAGATCCCGCTGCCTCC       |
| dGoligo3-TRβ1vA-uAUGs-ex3/ex2a-F                      | dG3               | 159→179                    | e3 TRβ1                          | sense                                 | manual                          | TGAATAAGAAGGAGATGTACAG        |
| dGoligo4-TRβ1vA-anti-uAUGs-ex3/ex2a-R                 | dG4               | 179→159                    | e3 TRβ1                          | antisense                             | manual                          | CTGACATCTCTCTTATTCA           |
| dGoligo5-TRβ1vA-mirSenseIres-ex1c/ex2a-F              | dG5               | 86→108                     | e1 TRβ1                          | miRNA-like sense control              | manual                          | GGAGGCAGCGGGtagATCTGCGATTT    |
| dGoligo6-TRβ1vA-anti-mirAntiSenseIres-ex1c/ex2a-R     | dG6               | 108→86                     | e1 TRβ1                          | miRNA-like antisense control          | manual                          | AAATCGCAGATctaCCCGCTGCCTCC    |
| dGoligo7-TRβ1vA-cisAE-ex2a-F                          | dG7               | 129→151                    | e2 TRβ1                          | sense                                 | automated dGenhancer            | CGTGGGTGCCAAGTCCACACAT        |
| dGoligo8-TRβ1vA-anti-cisAE-ex2a-R                     | dG8               | 151→129                    | e2 TRβ1                          | antisense                             | automated                       | ATGTGTGGAActTGACCCACG         |
| dGoligo9-TRβ1vA-mirSenseCisAE-ex2a-F                  | dG9               | 129→151                    | e2 TRβ1                          | miRNA-like sense                      | automated dGenhancer            | CGTGGGTGCCAActaGTTCCACACAT    |
| dGoligo10-TRβ1vA-mirAntisense-cisAE-ex2a-R            | dG10              | 151→129                    | e2 TRβ1                          | miRNA-like antisense                  | automated                       | ATGTGTGGAActctTGACCCACG       |
| dGoligoSc-TRβ1vA                                      | dGsc              | 108→86                     | -                                | nonsense / scrambled control          | automated GeneScript            | GCCATCACTACGCTACCTCAGTCGA     |
| dGoligo1p16-p16INK4a5'UTR-sense-U                     | dG1p16            | 280→301                    | e1 p16                           | sense                                 | manual and automated dGenhancer | AGCAGGCAGCGGGCGGGGGGA         |
| dGoligo2p16-p16INK4a5'UTR-antisense-L                 | dG2p16            | 301→280                    | e1 p16                           | antisense                             | manual and automated dGenhancer | TCCCCGCCGCCGCTGCCTGCT         |
| dGoligo3p16-p16INK4a5'UTR-miRNA-U                     | dG3p16            | 280→301                    | e1 p16                           | miRNA-like sense                      | automated dGenhancer            | AGCAGGCAGCGGtaGCGGGGGGA       |
| dGoligo4p16-p16INK4a5'UTR-miRNA-L                     | dG4p16            | 301→280                    | e1 p16                           | miRNA-like antisense                  | automated dGenhancer            | TCCCCGCCGtaCCGCTGCCTGCT       |
| dGoligo5p16-p16INK4a5'UTR-sense-U                     | dG5p16            | 2→22                       | e2 p16                           | sense                                 | automated dGenhancer            | GAGGGCTGCTCCGGCTGGTG          |
| dGoligo6p16-p16INK4a5'UTR-antisense-L                 | dG6p16            | 22→2                       | e2 p16                           | antisense                             | automated dGenhancer            | CACCAGCCGAAGCAGCCCTC          |
| dGoligoGscp16-p16INK4a5'UTR                           | dGscp16           | 301→280                    | -                                | nonsense / scrambled control          | automated GeneScript            | GTCCTCGCTCCGACCCGGTCTC        |
| dGoligo-hsa-miR211                                    | dG211             | 192→168                    | e3/e4 TRβ1                       | miRNA                                 | miRBase                         | TTCCTTTGTCATCTTCGCT           |
| dGoligo-hsa-miR-211-3p                                | dG211c            | 168→192                    | e3/e4 TRβ1                       | Complem. miRNA                        | miRBase                         | GCAGGGACAGCAAAGGGGTGC         |

**Table S3. List of dGoligos (dGs) used in the study.**

Position in 5'UTR indicates dG recognition site in 5'UTR variant A of TRβ1 (TRβ1vA, GeneBank acc. no.: AY286465.1) encoded by *THRB* gene and in p16INK4a 5'UTR (NM\_000077.4) encoded by *CDKN2A*. 2-3-nucleotide, microRNA-mimicking loop is indicated with lowercase letters, dGsc-scrambled control.

dGenhancer - see Appendix S1

GeneScript - <https://www.genscript.com/ssl-bin/app/scramble>

miRBase - <http://www.mirbase.org/>
