# Supplementary material for: A Novel Method for Gene-Specific Enhancement of Protein Translation by Targeting 5’UTRs of Selected Tumor Suppressors
Source: PubMed Central journal article supplement (PMC4865139; doi:10.1371/journal.pone.0155359), 2016-05-12
Supplement: pone.0155359.s014.pdf [file pone.0155359.s014.pdf]

| Oligonucleotide name              | Oligonucleotide Sequence<br>5' → 3'                             | Recognition site<br>/target                   | Description                  | Strand orientation |
|-----------------------------------|-----------------------------------------------------------------|-----------------------------------------------|------------------------------|--------------------|
| T7prom-f                          | TATGTAATACGACTCACTATAGGG                                        | T7 promoter, only DNA                         | Real Time PCR, PCR product B | sense, forward     |
| Luc-RT-f                          | CACCATGGAAGACGCCAA                                              | Luciferase Kozak cons. seq./coding sequence   | Real Time PCR, PCR product A | sense, forward     |
| Luc-RT-r                          | CCAGCGGTTCCATCTTCCAG                                            | Luciferase sequence                           | Real Time PCR, PCR product A | antisense, reverse |
| Luc-rev-r                         | GATGTCCACCTCGATATGTGC                                           | Luciferase sequence                           | Reverse Transcription        | antisense, reverse |
| Ffir                              | ATCGTGGACCGCTGAAGTC                                             | Firefly luciferase                            | Real-Time-PCR                | forward            |
| Rfir                              | ACGACGGCGGCAGGCAGC                                              | Firefly luciferase                            | Real-Time-PCR                | reverse            |
| Fren                              | TGAGGAGTTCGCTGCCTACC                                            | <i>Renilla</i> luciferase                     | Real-Time-PCR                | forward            |
| Ren                               | TGCGGACAATCTGGACGACG                                            | <i>Renilla</i> luciferase                     | Real-Time-PCR                | reverse            |
| P1                                | GTAATTTGGCTAGAGGACC                                             | 5' end of TRβ1 ex. 1c (specific to variant A) | PCR                          | forward            |
| P2                                | GTCCTAGAAAGGAAAGCACAG                                           | 5' end of TRβ1 ex. 1e (specific to variant F) | PCR                          | forward            |
| P3                                | AGGACCGCGCGGAGGCAG                                              | 3' end of TRβ1 ex.1c (specific to variant A)  | PCR                          | forward            |
| P4                                | TCGAAGCTTCAGTCAGTGG-CAACCAGAAGGAAATCGCAGAT                      | 5'end of TRβ1 2a with 5'overhang              | PCR                          | reverse            |
| P5                                | TGACATTTGCAGGACTCG                                              | 3'end of TRβ1 ex. 1a (specific to variant F)  | PCR                          | forward            |
| P6                                | CCAACCAGAAGGAAATCGCAG                                           | TRβ1 2a                                       | PCR                          | reverse            |
| S0.F                              | CGAGGGCTGCTCCGGCT                                               | p16INK4a 5'UTR                                | PCR0                         | forward            |
| S0.R                              | GCTGCTCCCGCTGCCCGCT                                             | p16INK4a 5'UTR                                | PCR0                         | reverse            |
| SI.F (cSIII.F – T7p. – p16 5'UTR) | TCGAAGCTTCAGTCAGT-ATATGTAATACGACTCACTATAGGG-T-CGAGGGCTGCTCCGGCT | p16INK4a 5'UTR linear construct               | PCR1                         | forward            |
| SI.R(cSII.F)                      | GTTTTGGCGTCTCCAT-GCTGCTCCCGCCCGCT                               | p16INK4a 5'UTR linear construct               | PCR1                         | reverse            |
| SII.F                             | TGGAAGACGCCAAAAACAT                                             | p16INK4a 5'UTR linear construct               | PCR2                         | forward            |
| SII.R(cSIII.R)                    | TGACCCTGGTTGACCCTACT-CCGGAAGGAGCTGACTGG                         | p16INK4a 5'UTR linear construct               | PCR2                         | reverse            |
| SIII.F                            | TCGAAGCTTCAGTCAGT                                               | p16INK4a 5'UTR linear construct               | PCR3                         | forward            |
| SIII.R                            | TGACCCTGGTTGACCCTACT                                            | p16INK4a 5'UTR linear construct               | PCR3                         | reverse            |

**Table S4. List of primers used in Real-Time and classic PCR.**

This table contains sequences of DNA oligonucleotides (primers) used in reverse transcription and PCR assays of TRβ1 (*THRB*) and p16INK4a (*CDKN2A*; see Appendix S1).
