# Supplementary material for: A Novel Method for Gene-Specific Enhancement of Protein Translation by Targeting 5’UTRs of Selected Tumor Suppressors
Source: PLoS One. 2016 May 12;11(5):e0155359. doi: 10.1371/journal.pone.0155359 (PMC4865139; doi:10.1371/journal.pone.0155359)
Supplement: S1 Fig — (PDF) [file pone.0155359.s002.pdf]

## Supporting figures

**a**

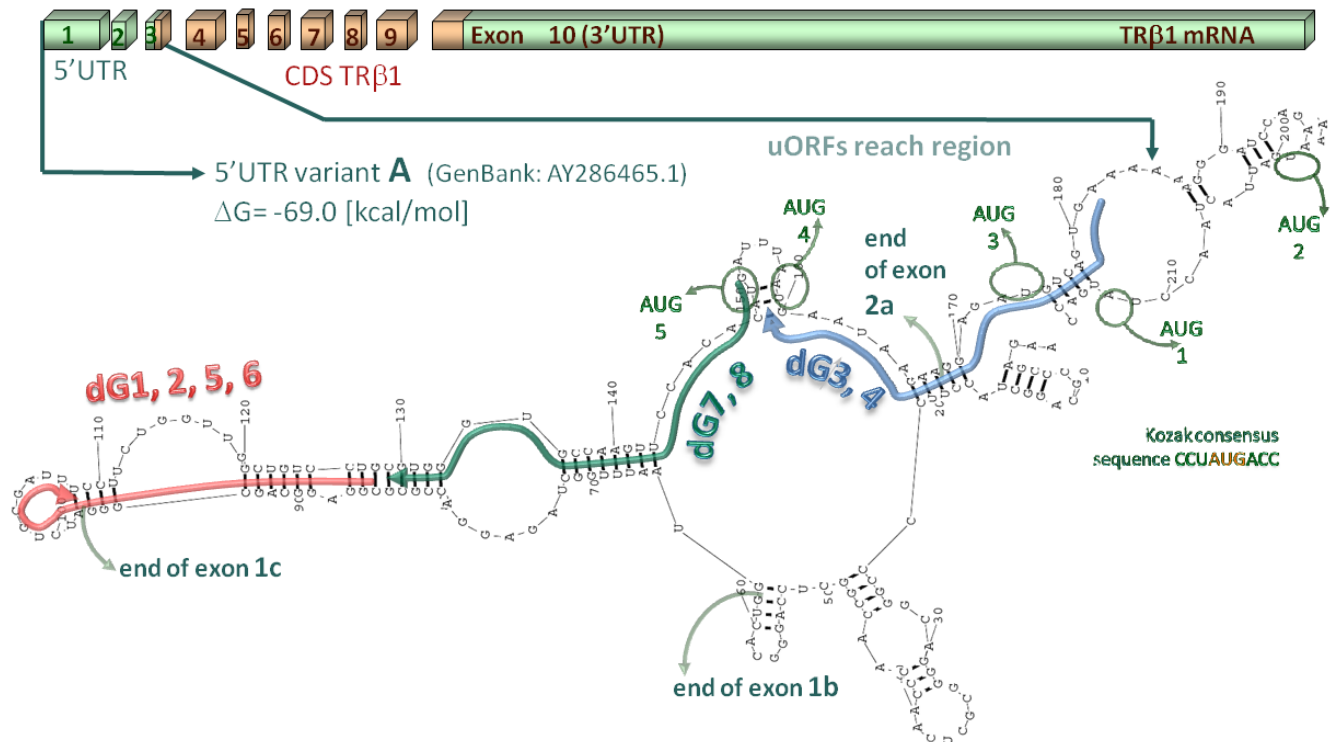

**b**

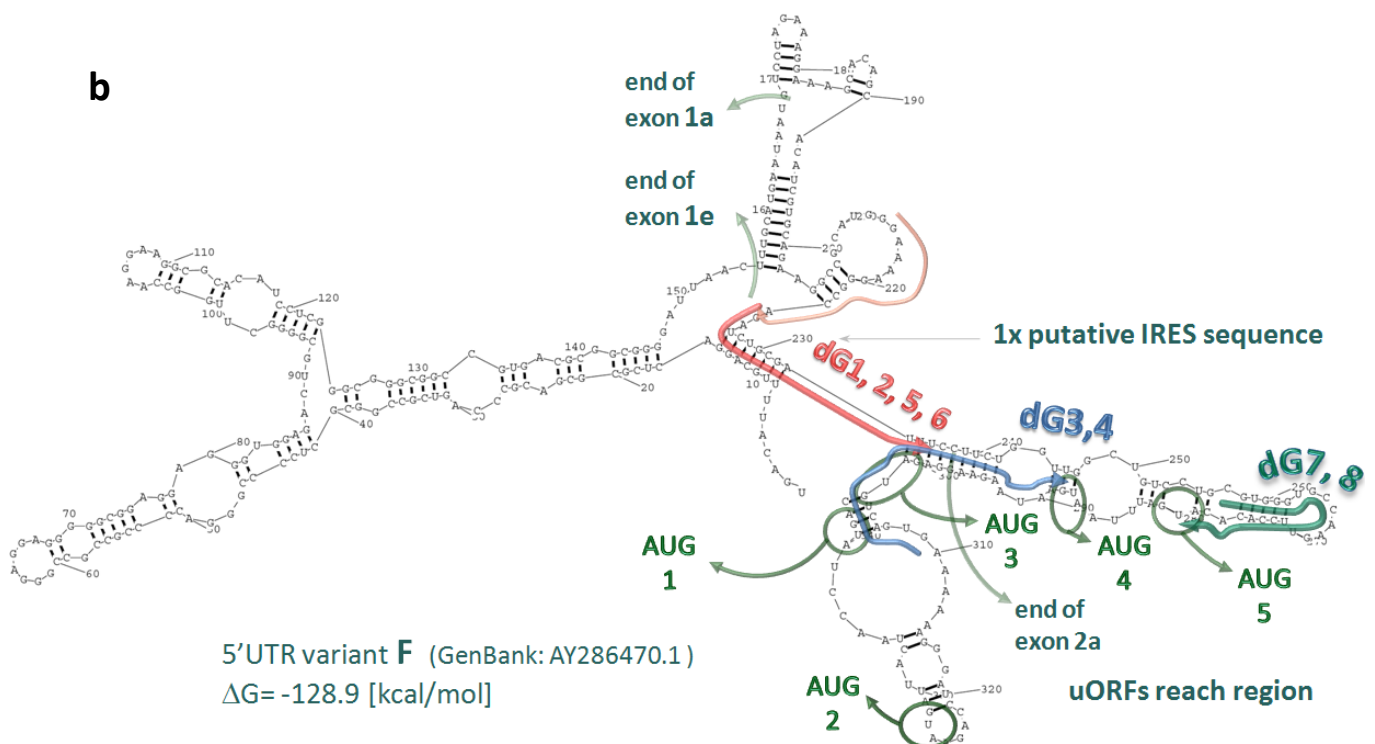

**c**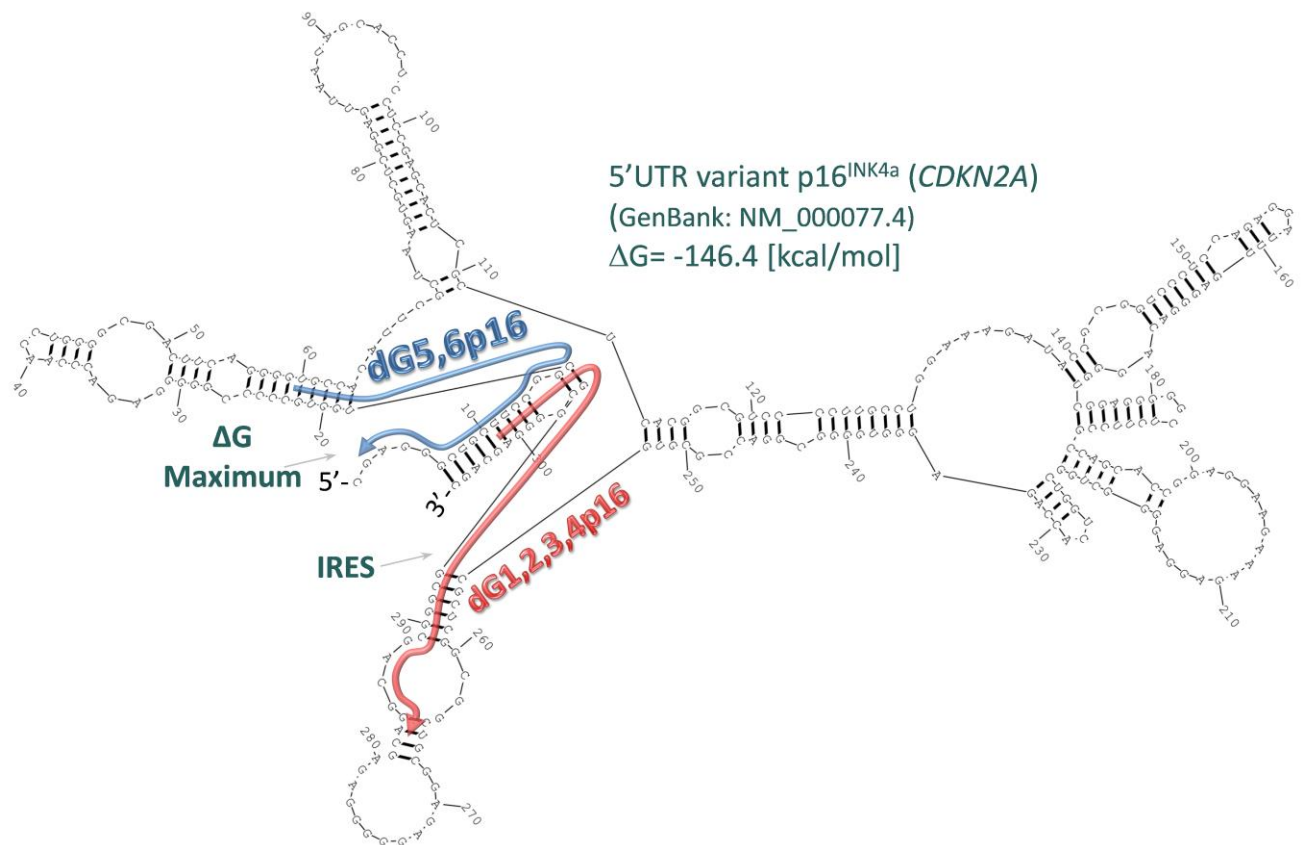

### Fig S1. Folding of TRβ1 5'UTRs.

Secondary structures were modeled using RNAstructure version 5.2. (a) Weakly folded 5'UTR variant A ( $\Delta G = -69.0$  kcal/mol) and (b) Strongly folded 5'UTR variant F ( $\Delta G = -128.9$  kcal/mol) with indicated 5'UTR exons and coding sequence of TRβ1 mRNA (GeneBank Acc. No. NM\_000461). Variant F lacks ex1c present in variant A what results in incomplete sequence homology at 3'-end of antisense dG2. Putative IRES sequences (Master et al. 2010), uAUGs (Frankton et al. 2004), exon-exon junctions and dG binding sites are indicated with arrows in both figures. This set of enhancing dGs can result in simultaneous unblocking of putative IRES sequence and blocking of uAUGs-rich region leading to significant enhancement of translation efficiency (see Fig 4). (c) Strongly folded 5'UTR variant p16<sup>INK4a</sup> encoded (*CDKN2A*) ( $\Delta G = -146.4$  kcal/mol, GeneBank Acc. No. NM\_000077.4) with indicated dGp16 target sites,  $\Delta G$  maximum (identified by dGenhancer) and IRES sequence reported by Bisio et al. 2015.
