# Supplementary material for: A Novel Method for Gene-Specific Enhancement of Protein Translation by Targeting 5’UTRs of Selected Tumor Suppressors
Source: PLoS One. 2016 May 12;11(5):e0155359. doi: 10.1371/journal.pone.0155359 (PMC4865139; doi:10.1371/journal.pone.0155359)
Supplement: S6 Fig — (PDF) [file pone.0155359.s007.pdf]

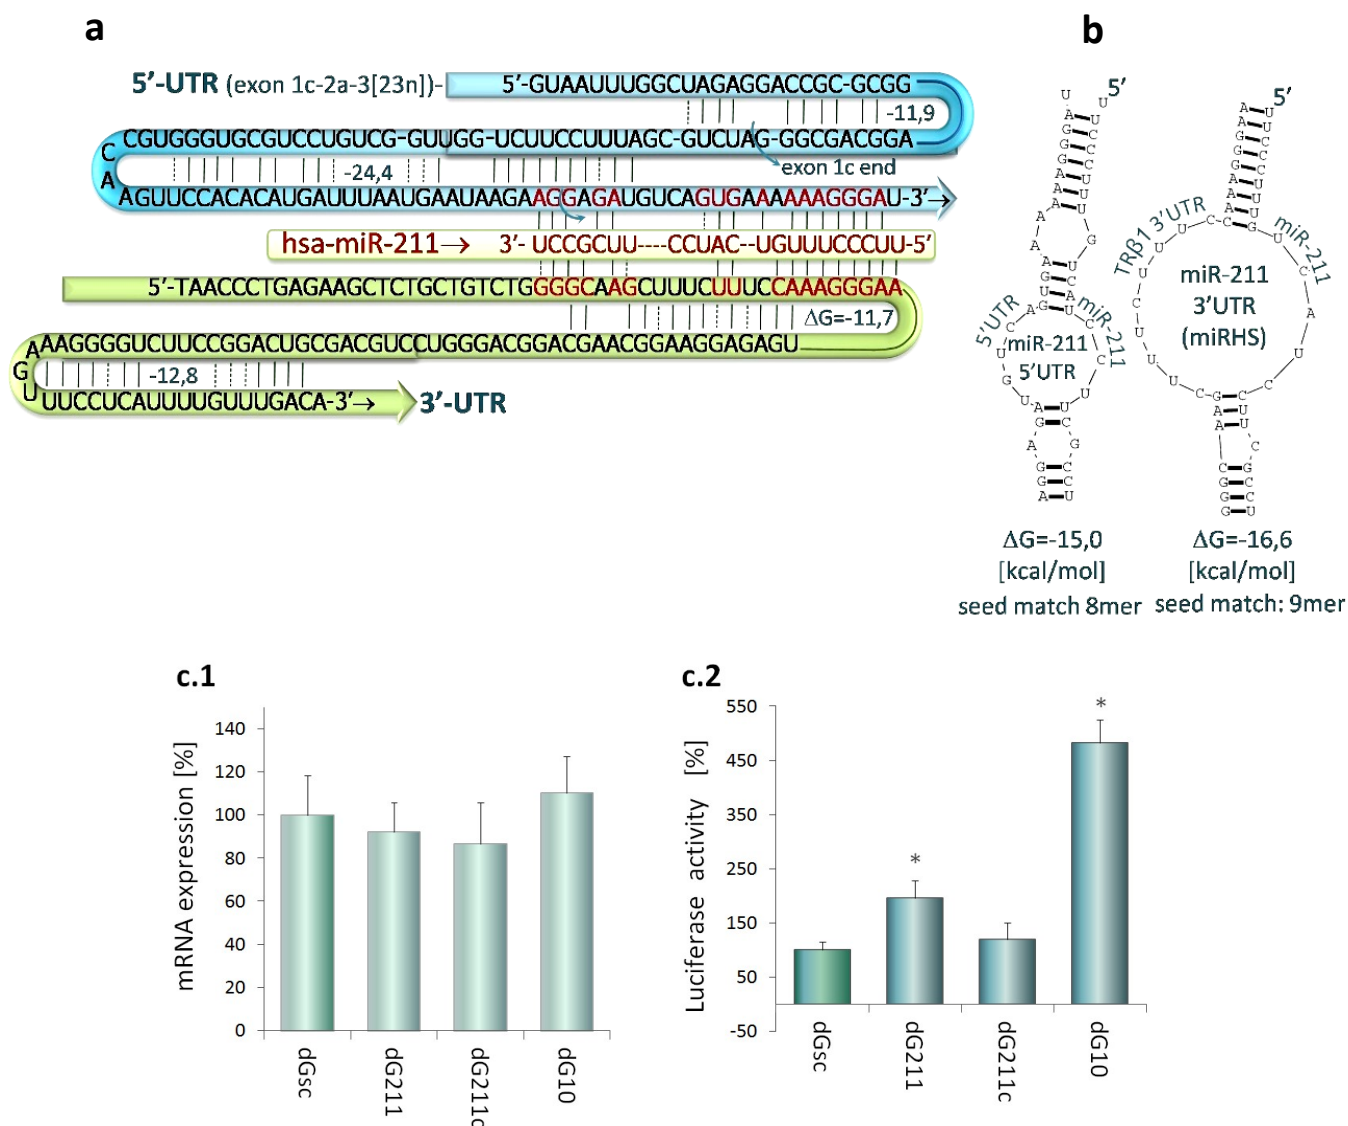

**Fig S6. Potential hsa-miR-211 target sites within TRβ1 3'UTR and 5'UTR.**

(a) Target sites for a microRNA - hsa-miR-211 (miRBase Acc. no. MI0000287) in TRβ1 untranslated regions are highlighted in blue (5'UTR) and green (3'UTR). This non-selective microRNA binding may influence secondary structures of both UTRs and contribute to changes in Gibbs energy that finally may affect protein synthesis. (b) Target sites within TRβ1 UTR sequences were identified using miRBase (<http://www.mirbase.org>) and RNAhybrid (<http://bibiserv.techfak.uni-bielefeld.de/rnahybrid/>) that uses a Gibbs energy ( $\Delta G$ ) algorithm to calculate favorable binding interactions between a microRNA and potential target sites within mRNA. (c) Effects of 2'-O-methyl RNA modified hsa-miR-211 termed dG*Goligo*-hsa-miR211 (dG211, Table S3), dG*Goligo*-hsa-miR211-3p (dG211c, -complementary to dG211), dG10 and scrambled control (dGsc) on luciferase transcription (c.1) and translation (c.2) in Caki-2 cells transfected with pGL3-A (see Appendix S1), containing TRβ1 5'UTR variant A, luciferase coding sequence and irrelevant 3'UTR. miRBase and RNAhybrid - based analysis revealed no hsa-miR-211 and hsa-miR211-3p targets within pGL3-A 3'UTR, suggesting that the observed effects (c) could be mediated through TRβ1 5'UTR. Although our dG10 (designed on the basis of TRβ1 5'UTR) showed the strongest translation-enhancing effect in Caki-2 cells (see Fig 6), hsa-miR-211 (dG211) enhanced translation by 1.95-fold as well and had no effects on luciferase mRNA levels. Results from three independent experiments performed in triplicates are shown as mean % mRNA (a) or luciferase activity (b)  $\pm$  SD. Data analyzed by ANOVA followed by Dunnett's multiple comparison test. \* $p < 0.001$  vs. control.
